# Supplementary material for: Colorectal Cancer‐Derived Small Extracellular Vesicles Promote Tumor Immune Evasion by Upregulating PD‐L1 Expression in Tumor‐Associated Macrophages
Source: PubMed Central journal article supplement (PMC8948581; doi:10.1002/advs.202102620), 2022-01-17
Supplement: ADVS-9-2102620-s002.pdf [file ADVS-9-2102620-s002.pdf]

## Supporting Information

for *Adv. Sci.*, DOI 10.1002/adv.202102620

Colorectal Cancer-Derived Small Extracellular Vesicles Promote Tumor Immune Evasion by Upregulating PD-L1 Expression in Tumor-Associated Macrophages

*Yuan Yin, Bingxin Liu, Yulin Cao, Surui Yao, Yuhang Liu, Guoying Jin, Yan Qin, Ying Chen, Kaisa Cui, Leyuan Zhou, Zehua Bian, Bojian Fei, Shenglin Huang\* and Zhaohui Huang\**

| Variable                                   | Univariable analysis |            |         | Multivariable analysis |            |         |
|--------------------------------------------|----------------------|------------|---------|------------------------|------------|---------|
|                                            | HR                   | 95%CI      | P value | HR                     | 95%CI      | P value |
| <b>Age</b>                                 |                      |            |         |                        |            |         |
| <60 or ≥60                                 | 1.4                  | (1.2-1.8)  | 0.00027 | 1.6                    | (1.3-1.9)  | 3.7e-07 |
| <b>Gender</b>                              |                      |            |         |                        |            |         |
| Male or Female                             | 0.78                 | (0.58-1.1) | 0.11    |                        |            |         |
| <b>T stage</b>                             |                      |            |         |                        |            |         |
| 1, 2, 3 or 4                               | 1.9                  | (1.5-2.5)  | 3e-06   | 1.7                    | (1.3-2.3)  | 3e-04   |
| <b>N stage</b>                             |                      |            |         |                        |            |         |
| 0, 1 or 2                                  | 1.5                  | (2.1-4.5)  | 1.9e-05 | 1.4                    | (1.1-1.9)  | 0.017   |
| <b>M stage</b>                             |                      |            |         |                        |            |         |
| 0 or 1                                     | 5.4                  | (3.8-7.8)  | 1.1e-19 | 5.9                    | (3-12)     | 3.2e-07 |
| <b>TNM Stage</b>                           |                      |            |         |                        |            |         |
| I , II , III or IV                         | 2.1                  | (1.7-2.6)  | 5.8e-12 | 1.81                   | (0.81-1.8) | 0.037   |
| <b>Location</b>                            |                      |            |         |                        |            |         |
| left or right                              | 0.9                  | (0.66-1.2) | 0.5     |                        |            |         |
| <b>CD206<sup>+</sup> CD274<sup>+</sup></b> |                      |            |         |                        |            |         |
| low or high                                | 1.7                  | (0.7-1.6)  | 8.2e-09 | 1.5                    | (1.4-2.3)  | 4e-06   |

| Variable                                   | Univariable analysis |            |         | Multivariable analysis |            |         |
|--------------------------------------------|----------------------|------------|---------|------------------------|------------|---------|
|                                            | HR                   | 95%CI      | P value | HR                     | 95%CI      | P value |
| <b>Age</b>                                 |                      |            |         |                        |            |         |
| <60 or ≥60                                 | 1.6                  | (1.2-2)    | 0.00058 | 1.6                    | (1.3-1.9)  | 2.7e-05 |
| <b>Gender</b>                              |                      |            |         |                        |            |         |
| Male or Female                             | 0.95                 | (0.65-1.4) | 0.78    |                        |            |         |
| <b>T stage</b>                             |                      |            |         |                        |            |         |
| 1, 2, 3 or 4                               | 3                    | (2-4.5)    | 4.4e-08 | 1.7                    | (1.3-2.3)  | 0.0015  |
| <b>N stage</b>                             |                      |            |         |                        |            |         |
| 0, 1 or 2                                  | 2                    | (1.6-2.4)  | 1.9e-05 | 1.4                    | (1.1-1.9)  | 0.01    |
| <b>M stage</b>                             |                      |            |         |                        |            |         |
| 0 or 1                                     | 3.6                  | (3.8-7.8)  | 9.2e-10 | 5.9                    | (3-12)     | 0.33    |
| <b>TNM Stage</b>                           |                      |            |         |                        |            |         |
| I , II , III or IV                         | 2.1                  | (1.7-2.6)  | 7.2e-12 | 1.81                   | (0.81-1.8) | 0.038   |
| <b>CD206<sup>+</sup> CD274<sup>+</sup></b> |                      |            |         |                        |            |         |
| low or high                                | 1.9                  | (1.4-2.0)  | 7.2e-08 | 1.6                    | (1.5-2.1)  | 4e-06   |
