# Supplementary material for: Colorectal Cancer‐Derived Small Extracellular Vesicles Promote Tumor Immune Evasion by Upregulating PD‐L1 Expression in Tumor‐Associated Macrophages
Source: PubMed Central journal article supplement (PMC8948581; doi:10.1002/advs.202102620), 2022-01-17
Supplement: ADVS-9-2102620-s003.pdf [file ADVS-9-2102620-s003.pdf]

## Supporting Information

for *Adv. Sci.*, DOI 10.1002/adv.202102620

Colorectal Cancer-Derived Small Extracellular Vesicles Promote Tumor Immune Evasion by Upregulating PD-L1 Expression in Tumor-Associated Macrophages

*Yuan Yin, Bingxin Liu, Yulin Cao, Surui Yao, Yuhang Liu, Guoying Jin, Yan Qin, Ying Chen, Kaisa Cui, Leyuan Zhou, Zehua Bian, Bojian Fei, Shenglin Huang\* and Zhaohui Huang\**

## CRC cohorts from Affiliated Hospital of Jiangnan University

| Variable                                   | Univariable analysis |             |         | Multivariable analysis |             |         |
|--------------------------------------------|----------------------|-------------|---------|------------------------|-------------|---------|
|                                            | HR                   | 95%CI       | P value | HR                     | 95%CI       | P value |
| <b>Age</b>                                 |                      |             |         |                        |             |         |
| <60 or ≥60                                 | 1.2                  | (0.74-1.89) | 0.092   | 1.52                   | (0.73-2.21) | 0.231   |
| <b>Gender</b>                              |                      |             |         |                        |             |         |
| Male or Female                             | 0.87                 | (0.65-1.74) | 0.643   | 0.96                   | (0.83-1.63) | 0.852   |
| <b>T stage</b>                             |                      |             |         |                        |             |         |
| 1, 2, 3 or 4                               | 1.32                 | (0.89-1.56) | 0.031   | 1.46                   | (0.63-2.41) | 0.151   |
| <b>N stage</b>                             |                      |             |         |                        |             |         |
| 0, 1 or 2                                  | 1.54                 | (0.98-1.97) | 0.052   | 1.76                   | (0.94-2.16) | 0.125   |
| <b>M stage</b>                             |                      |             |         |                        |             |         |
| 0 or 1                                     | 2.01                 | (0.99-4.81) | 0.041   | 2.32                   | (0.87-4.27) | 0.141   |
| <b>TNM Stage</b>                           |                      |             |         |                        |             |         |
| I + II or III + IV                         | 1.46                 | (0.98-2.21) | 0.015   | 1.66                   | (0.95-2.54) | 0.032   |
| <b>location</b>                            |                      |             |         |                        |             |         |
| Colon or Rectum                            | 0.75                 | (0.75-1.01) | 0.012   | 0.87                   | (0.66-0.97) | 0.035   |
| <b>Tumor Size</b>                          |                      |             |         |                        |             |         |
| <5cm or ≥5cm                               | 0.93                 | (0.87-1.35) | 0.091   | 0.99                   | (0.65-1.32) | 0.152   |
| <b>CD206<sup>+</sup> CD274<sup>+</sup></b> |                      |             |         |                        |             |         |
| low or high                                | 1.45                 | (0.89-2.15) | 0.013   | 1.61                   | (0.78-2.12) | 0.031   |

## TCGA-CRC

| Variable                                   | Univariable analysis |            |         | Multivariable analysis |            |         |
|--------------------------------------------|----------------------|------------|---------|------------------------|------------|---------|
|                                            | HR                   | 95%CI      | P value | HR                     | 95%CI      | P value |
| <b>Age</b>                                 |                      |            |         |                        |            |         |
| <60 or ≥60                                 | 1.5                  | (1.2-1.8)  | 0.00079 | 1.6                    | (1.3-2)    | 0.66    |
| <b>Gender</b>                              |                      |            |         |                        |            |         |
| Male or Female                             | 0.88                 | (2.5-5.5)  | 0.51    |                        |            |         |
| <b>T stage</b>                             |                      |            |         |                        |            |         |
| 1, 2, 3 or 4                               | 3.1                  | (1.6-2.4)  | 8e-10   | 2.4                    | (1.5-3.7)  | 1.6e-05 |
| <b>N stage</b>                             |                      |            |         |                        |            |         |
| 0, 1 or 2                                  | 2                    | (2.1-4.5)  | 5.5e-09 | 1.5                    | (1-2.1)    | 0.16    |
| <b>M stage</b>                             |                      |            |         |                        |            |         |
| 0 or 1                                     | 3.7                  | (1.7-2.6)  | 6.1e-12 | 1.8                    | (0.79-4)   | 0.041   |
| <b>TNM Stage</b>                           |                      |            |         |                        |            |         |
| I, II, III or IV                           | 2.1                  | (0.61-1.3) | 9.2e-11 | 1.1                    | (0.63-2.1) | 0.00011 |
| <b>CD206<sup>+</sup> CD274<sup>+</sup></b> |                      |            |         |                        |            |         |
| low or high                                | 1.7                  | (0.7-1.6)  | 8.2e-09 | 1.42                   | (0.71-2.3) | 0.02    |
